# Supplementary material for: Convergent Evolution of Escape from Hepaciviral Antagonism in Primates
Source: PubMed Central journal article supplement (PMC3302847; doi:10.1371/journal.pbio.1001282), 2012-03-13
Supplement: pbio.1001282.s005.pdf [file pbio.1001282.s005.pdf]

|                              |                                                    |    |
|------------------------------|----------------------------------------------------|----|
| Human                        | MPFAEDKTYKYICRNFSNFCNVDVVEILPYLPCLTARDQDRLRATCTLSG | 50 |
| Chimpanzee                   | MPFAEDKTYKYICRNFSNFCNVDVVEILPYLPCLTARDQDRLRATCTLSG | 50 |
| Western_lowland_gorilla      | MPFAEDKTYKYICRNFSNFCNVDVVEILPYLPCLTARDQDRLRATCTLSG | 50 |
| Bornean_orangutan            | MPFAEDKTYKYICHNFSNFCNVDVVEILPYLPCLTARDQDRLRATCTLSG | 50 |
| White-cheeked_gibbon         | MPFAEDKTYKYICHNFSNFCNVDVVEILPYLPCLTARDQDRLRATCTLSG | 50 |
| Agile_gibbon                 | MPFAEDKTYKYICHNFSNFCNVDVVEILPYLPCLTARDQDRLRATCTLSG | 50 |
| Island_siamang_gibbon        | MPFAEDKTYKYICHNFSNFCNVDVVEILPYLPCLTARDQDRLRATCTLSG | 50 |
| Colobus_monkey               | MPFAEDKTYKYICRNFSNFCNVDVVEILPYLPCLTARDQDRLRATCTLSG | 50 |
| Francois'_leaf_monkey        | MPFAEDKTYKYICRNFSNFCNVDVVEILPYLPCLTARDQDRLRATCTLSG | 50 |
| Olive_baboon                 | MPFAEDKTYKYICRNFSNFCNVDVVEILPYLPCLTARDQDRLRATCTLSG | 50 |
| Rhesus_macaque               | MPFAEDKTYKYICRNFSNFCNVDVVEILPYLPCLTARDQDRLRATCTLSG | 50 |
| Talapoin_monkey              | MPFAEDKTYKYICRNFSNFCNVDVVEILPYLPCLTARDQDRLRATCTLSG | 50 |
| African_green_monkey         | MPFAEDKTYKYICRNFSNFCNVDVVEILPYLPCLTARDQDRLRATCTLSG | 50 |
| Patas_monkey                 | MPFAEDKTYKYICRNFSNFCNVDVVEILPYLPCLTARDQDRLRATCTLSG | 50 |
| Allen's_swamp_monkey         | MPFAEDKTYKYICRNFSNFCNVDVVEILPYLPCLTARDQDRLRATCTLSG | 50 |
| Duski_titi_monkey            | MPFAEDKTYKYICRHFSNFCNVDVVEILPYLPCLTARDQDRLRATCTLSG | 50 |
| Common_woolly_monkey         | MPFAEDKTYKYICRHFSNFCNVDVVEILPYLPCLTARDQDRLRAICTLSG | 50 |
| Black-handed_spider_monkey   | MPFAEDKTYNYICRHFSNFCNVDVVEILPYLPCLTARDQDRLRAICTLSG | 50 |
| Owl_monkey                   | MPFAEDKTYKYICRHFSNFCNVDVVEILPYLPCLTARDQDRLRATCTLFG | 50 |
| Red-chested_mustached_monkey | MPFAEEKTYKYICRHFSNFCNVDVVEILPYLPCLTARDQDRLRATCTLSG | 50 |
| Common_marmoset              | MPFAEDKTYKYICRHFSNFCNVDVVEILPYLPCLTARDQDRLRATCTLSG | 50 |

\*\*\*\*\*:\*\*\*:\*\*\*:\*\*\*\*\* \* \* \*

|                              |                                                    |     |
|------------------------------|----------------------------------------------------|-----|
| Human                        | NRDTLWHLFNTLQRRPGWVEYFIAALRGCELVDLADEVASVYQSYQPRTS | 100 |
| Chimpanzee                   | NRDTLWHLFNTLQRRPGWVEYFIAALRGCELVDLADEVASVYQSYQPRTS | 100 |
| Western_lowland_gorilla      | NRDTLWHLFNTLQRRPGWVEYFIAALRDCELVDLADEVASVYQSYQPRTS | 100 |
| Bornean_orangutan            | NRDTLWYLFNTLQRRPGWVEYFIAALRGCELSDLADEVACVYQSYQPRTL | 100 |
| White-cheeked_gibbon         | NRDTLWHLFNTLQRRPGWVEYFITALRGCELADLADEVACVYQSYQPRTL | 100 |
| Agile_gibbon                 | NRDTLWHLFNTLQRRPGWVEYFITALRGCELADLADEVACVYQSYQPRTL | 100 |
| Island_siamang_gibbon        | NRDTLWHLFNTLQRRPGWVEYFITALRGCELADLADEVACVYQSYQPRTL | 100 |
| Colobus_monkey               | NRDTLWHLFNTLQRRPGWVESFIAALRDCELDLADEVACVYQRYQPRTS  | 100 |
| Francois'_leaf_monkey        | NRDTLWHLFNTLQRRPGWVESFIAALRDCELDLADEVAGVYQSYQPRTS  | 100 |
| Olive_baboon                 | NRDTLWHLFNTLQRRPGWVESFIAALRDCELDLADEVACVYQSYQPRTL  | 100 |
| Rhesus_macaque               | NRDTLWHLFNTLQRRPGWVESFIAALRDCELDLADEVACVYQSYQPRTS  | 100 |
| Talapoin_monkey              | NRDTLWHLFNTLQRRPGWVESFIAALRDCELDLADEVACVYQSYQPRTS  | 100 |
| African_green_monkey         | NRDTLWHLFNTLQRRPGWVESFIAALRDCELDLADEVACVYQSYQPRTS  | 100 |
| Patas_monkey                 | NRDTLWHLFNTLQRRPGWVESFIAALRDCELDLADEVACVYQSYQPRTS  | 100 |
| Allen's_swamp_monkey         | NRDTLWHLFNTLQRRPGWVESFIAALRDCELDLADEVACVYQSYQPRTS  | 100 |
| Duski_titi_monkey            | NRDTLWHLFNTLQRRPGWVESFIVALRACELSDLADEVARVYQSYQPRTP | 100 |
| Common_woolly_monkey         | NRDTLWHLFNTLQRRPGWVESFIVALRACELSDLADEVARVYQSYQPRTP | 100 |
| Black-handed_spider_monkey   | NRDTLWHLFNTLQRRPGWVESFIVALRACELSDLADEVACAYQSYQPRTP | 100 |
| Owl_monkey                   | NRDTLWHLFNTLQRRPGWVESFIVALRACELSELADEVTRVYQSYQPRTP | 100 |
| Red-chested_mustached_monkey | NRDTLWHLFNTLQRRPGWVESFIVALRACELSDLADEVARVYQSYQPRTP | 100 |
| Common_marmoset              | NRDTLWHLFNTLQRRPGWVESFIVALRACELSDLADEVARVYQSYQPRTP | 100 |

\*\*\*\*\*:\*.:\*\*\*\*\* \* .\*\*\* \*\* :\*\*\*\*\*: .\* \*\*\*\*\*

|                              |                                                   |     |
|------------------------------|---------------------------------------------------|-----|
| Human                        | DRPPDPLEPPSLPAERPGPPTPAAAHSIPYNCREKEPSYMPVQETQAP  | 150 |
| Chimpanzee                   | DCPPDPLEPPSLPAERPGPPTPAAAHSIPYNCREKEPSYMPVQETQVP  | 150 |
| Western_lowland_gorilla      | DRPPDPLEPPSLPAERPGPPTPAAAHSIPYNCREKEPSYMPVQETQAP  | 150 |
| Bornean_orangutan            | DRPPDPLEPPSLPAEGPGPPTPAAAHSIPYNGCREKEPSYMPVQETQAP | 150 |
| White-cheeked_gibbon         | DRPPDPLEPPSLPAEGPGPPTPAAAHSIPYNGCREKEPSYMPVQETQVP | 150 |
| Agile_gibbon                 | DRPPDPLEPPSLPAEGPGPPTPAAAHSIPYNGCREKEPSYMPVQETQVP | 150 |
| Island_siamang_gibbon        | DRPPDPLEPPSLPAEGPGPPTPAAAHSMPYNGCREKEPSYMPVQETQVP | 150 |
| Colobus_monkey               | DRPLDPLEPPSLPAEGPGPPTPAVAHSIPYNGYREKEPSYMPVQETQAP | 150 |
| Francois'_leaf_monkey        | DRPLDPLEPPSLPAEGPGPPTPAAAHSIPYNGYREKEPSYMPVQETQVP | 150 |
| Olive_baboon                 | DRPPDPLEPPSLPAEGPGPPTPAAAHSIPYNGYREKEPSYMPVQETQAP | 150 |
| Rhesus_macaque               | DRPPDPLEPPSLPAEGPGPPTPAATHSIPYNGYREKEPSYMPVQETQAP | 150 |
| Talapoin_monkey              | DRPPDPLEPPSLPAEGPGPPTPAAAHSIPYNGYREKEPSYMPVQETRAP | 150 |
| African_green_monkey         | DRPPDPLEPPSLPAEGPGPPTPAAAHSIPYNSYREKEPSYMPVQETRAP | 150 |
| Patas_monkey                 | DRPPDPLEPPSLPAEGPGPPTPAAAHSIPYNGYREKEPSYMPVQETRAP | 150 |
| Allen's_swamp_monkey         | DRPPDPLEPPSLPAEGPGPPTPAAAHSIPYNGYREKEPSYMPVQETRAP | 150 |
| Duski_titi_monkey            | EYPPAPLEPPSVSAEVPGPSTPAVAYSIPYNGYREKEPSYMPVQETQLP | 150 |
| Common_woolly_monkey         | EHPAPLEPPSVSAEVPGPSTPAAAHSIPYNGYREKEPSYMPVQETQLP  | 150 |
| Black-handed_spider_monkey   | EHPAPLEPPSVSAEVPGPSTPAAAHSIPYNGYREKEPSYMPVQETQLP  | 150 |
| Owl_monkey                   | EHPAPLEPPSVSAEVPGPSTPAAAHSIPYNGYREKEPSYMPVQDTPFP  | 150 |
| Red-chested_mustached_monkey | EHPAPLEPPSVSAEVPGPSTPAAAHSIPYNGYREKEPSYMPVQESQPP  | 150 |
| Common_marmoset              | EHPAPLEPPSVSAEVPGPSTPAAAHSIPYNGYREKEPSYMPVQESQPP  | 150 |
|                              | : * *****:..** **.*.***.:*:***. ***** :.***:: *   |     |

|                              |                                                     |     |
|------------------------------|-----------------------------------------------------|-----|
| Human                        | ESPGENSEQALQTLSPRAIPRNPDDGGPLESSDLAALSPLTSSGHQEQDT  | 200 |
| Chimpanzee                   | ESPGESSEQALQTLSPRAIPRNPDDGGPLESSDLAALSPLTSSGHQEQDT  | 200 |
| Western_lowland_gorilla      | ESPGESSEQALRMLSPRAIPRSPDGGPLESSDLAALSPLTSSGHQEQDT   | 200 |
| Bornean_orangutan            | ESPGESSEQARQMLSPRAIPRSPDGGPLESSDLAALSPLTSSGHQEQDT   | 200 |
| White-cheeked_gibbon         | ESPGESSEQAPQMLSPRAIPRSPDGGPLESSDLAALSPLTSSGHQEQDR   | 200 |
| Agile_gibbon                 | ESPGESSEQAPQMLSRRAIPRSPDGGPLESSDLAALSPLTSSGHQEQDR   | 200 |
| Island_siamang_gibbon        | ESPGESSEQAPQMLSPRAIPRSPDGGPLESSDLAALSPLTSSGHQEQDR   | 200 |
| Colobus_monkey               | ESPGESSEQAPQTLNPRVIPRSPDGGPLEPSSD---LSPLTSSGHQEQDT  | 197 |
| Francois'_leaf_monkey        | ESPGESSEQAPQTLNPRVIPRSPDGGPLEPSSDLAALSPLTSSGHQEQDT  | 200 |
| Olive_baboon                 | DSPGESSEQAPQTLNPRVIPRSPDGGPLEPSSDLAALSPLTSSGHQEQDT  | 200 |
| Rhesus_macaque               | DSPGESSEQAPQTLNPRVIPRSADGGPLEPSSDLAALSPLTSSGHQEQDT  | 200 |
| Talapoin_monkey              | DSPGESSEQAPQTLNPRVIPRSPDGGPLEPSSDLAALSPLTSSGHQEQDT  | 200 |
| African_green_monkey         | DSPGESSEQAPQTLNPRVIPRSPDGGPLDPSSDLAALSPLTSSGHQEQDT  | 200 |
| Patas_monkey                 | DSPGESSEQAPQTLNPRVIPRSPDGGPLDPSSDLAALSPLTSSSEHQEQDT | 200 |
| Allen's_swamp_monkey         | DSPGESSEQAPQTLNPRVIPRSPDGGPLEPSSDLAALSPLTSSRHQEQDT  | 200 |
| Duski_titi_monkey            | ESLEESSEQAPQMLSPGAVPRRPVGGPVEPSSDLAALSPLTSSRHQEQDT  | 200 |
| Common_woolly_monkey         | ESLEESSEQAPQTLSPGAI PRRPGGPVEPSSDLAALSPLTSSRHQEQDT  | 200 |
| Black-handed_spider_monkey   | ESLEESSEQAPQTLSPGAI PRRPGGPVEPSSDLAALFSPVTSSRHQEQDT | 200 |
| Owl_monkey                   | ETLEESSEQAPQTLSPGAI PRRPGGPVEPSSDLAALSPLTSSGHQEQDT  | 200 |
| Red-chested_mustached_monkey | ESLEESSEQAAQTLSPGAI PRRPGGPVEPSSDLAALSPVTSSGHQEQDT  | 200 |
| Common_marmoset              | ESLEESSEQAPQMLSPGAI PRRLGGPVEPSADLAALSPVTSSGHQEQDT  | 200 |
|                              | :: *.*.*** : *. :.*** *.*:..*: * :*:*** *****       |     |

|                              |                                                     |     |
|------------------------------|-----------------------------------------------------|-----|
| Human                        | ELGSTHTAGATSSSLTPSRGPVSPSVSFQPLARSTPRASRLPGPTGSVVST | 250 |
| Chimpanzee                   | ELGSTHTAGATSSSLTPSRGPVSPSVSFQPLARSTPRASHLPGPTVSVVST | 250 |
| Western_lowland_gorilla      | ELGSTHTAGATSSSLTPSRGPVSPSVSFQPLARSTPRASRLPGPTGSVVST | 250 |
| Bornean_orangutan            | ELGSTHIAGATSSSLTPSRGPVSPSVSFQPLARSTPRASRLPGPTGSVLST | 250 |
| White-cheeked_gibbon         | ELGSTHTAGATSSSLTASRGVSPSVSFQPLARSTPRASRLPGPTGSVVSP  | 250 |
| Agile_gibbon                 | ELGSTHTAGATSSSLTPSRGPVSPSVSFQPLARSTPRASRLPGPTGSVVSP | 250 |
| Island_siamang_gibbon        | ELGSTHTAGATSSSLTPSRGPVSPSVSFQPLARSTPRASRLPGPTGSVVSP | 250 |
| Colobus_monkey               | ELGSTHTAGVTSSSLTPSRGPVSPSVSFQPLARSTPRASRLPGPAGSVVST | 247 |
| Francois'_leaf_monkey        | ELGSTHTADATSSSLTPSRGPVSPSVSFQPLARSTPRASRLPGPAGSVVST | 250 |
| Olive_baboon                 | ELGSTHTKGATSSSLIPSRGPVSPSVSFQPLARSTPRASRLPGHAGSVVST | 250 |
| Rhesus_macaque               | ELGSTHTAGATSSSLIPSRGPVSPSVSFQPLARSTPRASRLPGPAGSVVST | 250 |
| Talapoin_monkey              | ELGSTHTAGATSSSLTPSRGPVSPSVSFQPLARSTPRASRLPGPAGSVVST | 250 |
| African_green_monkey         | ELGSTHTAGATSSSLTPSRGPVSPSVSFQPLARSTPRASRLPGPAGSVVST | 250 |
| Patas_monkey                 | ELGSTHTAGATSSSLTPSRGPVSPSVSFQPLARSTPRASRLPGPAGSVVST | 250 |
| Allen's_swamp_monkey         | ELGSTHTAGATSSSLTPSRGPVSPSVSFQPLARSTPRASRLPGPAGSVVST | 250 |
| Duski_titi_monkey            | ELGSTHTAGATSSSLTPSRGPVSPSVSFQPLARSTPRASRLPGPAGS-VST | 249 |
| Common_woolly_monkey         | ELGSTHTAGAPSSSLTPSRGPVSPSVSFQPLPRSTPRKSRLPGPAGS-VST | 249 |
| Black-handed_spider_monkey   | ELGSTHTAGAPSSSLTPSRGPVSPSVSFQPLPRSTPRKSRLPGPAGS-VST | 249 |
| Owl_monkey                   | ELGSTHTAGATTSLLTPSRGPVSPSVSFQPLSRSTPRASRLRGPAGS-VST | 249 |
| Red-chested_mustached_monkey | ELGSTHIAGATSSSLTPSRGPVSPSVSFQPLARSTPRASRLPGPAGS-VST | 249 |
| Common_marmoset              | ELGSTHTAGATSSSLTPSRGPVSPSVSFQPLARSTPRASRLPGPAGS-VST | 249 |
|                              | ***** ...:** .*****.***** *:* * : * :*.             |     |

|                              |                                                    |     |
|------------------------------|----------------------------------------------------|-----|
| Human                        | GTSFSS--SSPGLASAGAAEGKQGAESDQAEPICSSGAEAPANSLPSKV  | 298 |
| Chimpanzee                   | GTSFSS--SSPGLASAGAAEGKQGAESDQAEPICSSGAEAPANSLPSKV  | 298 |
| Western_lowland_gorilla      | GTSFSS--SSPGLASAGAAEGKQGAESDQAEPICSSGAEAPANSLPSKV  | 298 |
| Bornean_orangutan            | GTSSSS--SSPGLASAGAAEGKQGAESDQAEPITCSIGAEAPANSRPSKV | 298 |
| White-cheeked_gibbon         | GTSSSS--SSPGLASAGAAESKQGAESDQAEPICSRGAEAPANSLPSKV  | 298 |
| Agile_gibbon                 | GTSSSS--SSPGLASAGAAEGKQGAESDQAEPICSSGAEAPANSLPSKV  | 298 |
| Island_siamang_gibbon        | GTSSSS--SSPGLASAGAAEGKQGAESDQAEPICSSGAEAPANSLPSKV  | 298 |
| Colobus_monkey               | GTSSSS--S-PGLASAGAAEGEQAESDQAEPICSSGAEAPANSLPSKV   | 294 |
| Francois'_leaf_monkey        | GTSSSS--SSPGLASAGAAEGEQAESDQAEPICSSGAEAPANSLPSKV   | 298 |
| Olive_baboon                 | GTSSSSSSSSPGLASAGAAEGDQAESDQAEPICSSGAEAPANSLPSKV   | 300 |
| Rhesus_macaque               | GTSSSSSSSSPGLASAGAAEGEQAESDQAEPICSSGAEAPANSLPSKV   | 300 |
| Talapoin_monkey              | GTSSSSSS--SSPGLASAGAAEGEQAESDQAEPICSSGAEAPANSLPSKV | 299 |
| African_green_monkey         | GTSSSSSS--SSPGLASAGAAEGEQAESDQAEPICSSGAEAPANSLPSKV | 299 |
| Patas_monkey                 | GTSSSSSS--SSPGLASAGAAEGEQAESDQAEPICSSGAEAPANSLPSKV | 299 |
| Allen's_swamp_monkey         | GTSSSS---SCPGLASAGAAEDEQAESDQAEPICSSGAEAPANSLPSKV  | 297 |
| Duski_titi_monkey            | G--TSS--SSPGLASAGAEEG-----NQPEPSICSSGAEAPANSVPSKV  | 289 |
| Common_woolly_monkey         | GTFASS--SSPGLASAGTEEG-----DQPEPICSSGAEAPANPLPSKV   | 291 |
| Black-handed_spider_monkey   | GTFSSS--SSPGLASAGAEEG-----DQPEPICSSGAEAPANSLPSKV   | 291 |
| Owl_monkey                   | GTFSSSF--SSPGLASAGVEEG-----DQPEPICSSGAEAPANSLPSKV  | 291 |
| Red-chested_mustached_monkey | GTFSSS--SSPGLASAGVEEG-----DQPEPVICSSGAEAPANSLPSKV  | 291 |
| Common_marmoset              | GTFSSS--S-PGLASAGVEEG-----DQPEPVICSSGAEAPANSLPSKV  | 290 |
|                              | * * * *****. *. :*.** ** *****. ****               |     |

|                              |                                                     |     |
|------------------------------|-----------------------------------------------------|-----|
| Human                        | PTTLMPVNTVALKVPANPASVSTVPSKLPSTSSKPPGAVPSNALTNPAPSK | 348 |
| Chimpanzee                   | PTTLMPVNTVALKVPANPASVSTVPSKLPSTSSKPPGAVPSNVLTNPAPSK | 348 |
| Western_lowland_gorilla      | PTTLMPVNTVAPKVPANPASVSTVPSKLPSTSSKPPGAVPSNVLTNPAPSK | 348 |
| Bornean_orangutan            | PATLMPVNTVVPKVPADPASVSTAPSKLPASSKRPGAVPSNVLTNPAPSK  | 348 |
| White-cheeked_gibbon         | PTTLMPVNTVALKVPANPASVSTVPSKLPSTSSKPPGAVPSNVLTNPAPSK | 348 |
| Agile_gibbon                 | PTTLMPVNTVALKVPANPASVSTVPSKLPSTSSNPPGAVPSNVLTNPAPSK | 348 |
| Island_siamang_gibbon        | PTTLMPVNTVALKVPANPASVSTVPSKLPSTSSKPPGAVPSNVLTNPAPSK | 348 |
| Colobus_monkey               | PTTLMPVNTVAPKVPANPASASTLPSKLPSTSSKPPGAVPS-VFTNPAPSK | 343 |
| Francois'_leaf_monkey        | PTTLMPVNTVAPKVPANPASASTVPSKLPSTSSKPPGTGPS-VFTNPAPSK | 347 |
| Olive_baboon                 | PTTLMPVNTVAPKVPANPASASTVPSKLPSTSSKPPGAVPS-VFTNPAPSK | 349 |
| Rhesus_macaque               | PTTLMPVNTVAPKVPANPASASTVPSKLPSTSSKPPGTGPS-VFTNPAPSK | 349 |
| Talapoin_monkey              | PTTLMPVNTVAPKVPANPASASTVPSKLPSTSSKPPGAVPS-VFTNPAPSK | 348 |
| African_green_monkey         | PTTLMPVNTVAPKVPANPASASTVPSKLPSTSSKPPGAVPS-VFTNPAPSK | 348 |
| Patas_monkey                 | PTTLMPVNTVAPKVPANPASASTVPSKLPSTSSKPPGAVPS-VFTNPAPSK | 348 |
| Allen's_swamp_monkey         | PTTLMPVNTVAPKVPANPASASTVPSKLPSTSSKPPGAVPS-VFTNPAPSK | 346 |
| Duski_titi_monkey            | PTTLMPMNTVPPKVPANPASASTVLSKLPSSKPPDAVPSNVLTNPAPSK   | 339 |
| Common_woolly_monkey         | PTTLMPVNTVPLEVPANPASASTVPSKLPSSKPPGAVPSNVLTNPAPSK   | 341 |
| Black-handed_spider_monkey   | PTALMPVNTVPPKVPANPASASTVPSKLPSSKPPGAVPSNVLTNPAPSK   | 341 |
| Owl_monkey                   | PTTLMPVNTVPLEVPANPASASTVPSKLPSSKPPGAVPSNVLTNPAPSK   | 341 |
| Red-chested_mustached_monkey | PTTLMPVNTVPPKVPANPASASTVTSKLPSSKPPGAVPSNVLTNPAPSK   | 341 |
| Common_marmoset              | PTTLMPVNTVPPKVPANPASASTVTSKLPSSKPPGAVPSNVLTNPAPSK   | 340 |
|                              | *::***:*** :***:.*.* ** *.**.*: *.:*** .:** :***    |     |

|                              |                                                        |     |
|------------------------------|--------------------------------------------------------|-----|
| Human                        | LPINSTRAGMVPKVPPTSMVLTTKVSASTVPTDGRSSRNEETPAAPTTPAGAT  | 398 |
| Chimpanzee                   | LPINSTRAGMVPKVPPTSMVLTTKVSASTVPTDGRSSRNEETPAAPTTPVAGAT | 398 |
| Western_lowland_gorilla      | LPINSTRAGMVPKVPPTSMVLTTKVSASTVPTDRSSRNEETPAAPTTPAGAT   | 398 |
| Bornean_orangutan            | LPINSTRAGMVPKVPPTSMVLTTKVSASTVPTDRSSRNEETPAAPTTPAGAT   | 398 |
| White-cheeked_gibbon         | LPVNSTAGMVPKVPPTSMVLTTKVSASAVPTDRSSRNEETPAAPTTPAGAT    | 398 |
| Agile_gibbon                 | LPINSTRAGMVPKVPPTSMVLTTKVSASAVPTDRSSRNEETPAAPTTPAGAT   | 398 |
| Island_siamang_gibbon        | LPINSTRAGMVPKVPPTSMVLTTKVSASAVPTDRSSRNEETPAAPTTPAGAT   | 398 |
| Colobus_monkey               | LPINSTRAGMVPKVPPTSMVRTKVSASTVPTDRSSRTEETPAAPTTPAGAT    | 393 |
| Francois'_leaf_monkey        | LPINSTRAGMVPKVPPTSMVRTKVSASTVPTDRSSRTEETPAAPTTPAGAT    | 397 |
| Olive_baboon                 | LPINSTRAGMVPKVPPTSMVRTKVSASTVPTDRSSRTEETSAAPTTPAGAA    | 399 |
| Rhesus_macaque               | LPINSTRAGMVPKVPPTSMVRTKVSASTVPTDRSSRTEETSAAPTTPAGAT    | 399 |
| Talapoin_monkey              | LPINSTRAGMVPKVPPTSMVRTKVSASIVPTDRSSRTEETPAAPTTPAGAT    | 398 |
| African_green_monkey         | LPINSTRAGMVPKVPPTSMVRTKVSASTVPTDRSSRTEETPAAPTTPAGAT    | 398 |
| Patas_monkey                 | LPINSTRAGMVPKVPPTSMVRTKVSASTVPTDRSSRTEETPAAPTTPAGAT    | 398 |
| Allen's_swamp_monkey         | LPINSTRAGMVPKVPPTSMVRTKVSASTVPTDRSSRTEETPAAPTTPAGAT    | 396 |
| Duski_titi_monkey            | LPINSTRAGMVPKVPPTSMVLTGNTASTVPASRSSRAEETPAAPTTPAGAT    | 389 |
| Common_woolly_monkey         | LPINSTRAGMVPKVPPTSMVLTGNTASTVPTSRSSRAEETPAAPTTPAGAT    | 391 |
| Black-handed_spider_monkey   | LPINSTRAGMVPKVPPTSMVLTGNTASTVPTSRSSRAEETPAAPTTPAGAT    | 391 |
| Owl_monkey                   | LPINSTRAGMVPKVPPTSMVLTGNTASTVPTSRSSRAEENPAAPTTPAGAT    | 391 |
| Red-chested_mustached_monkey | LPINSTRAGMVPKVPPTSMVLTGNTASTVPTSRSSRAKETPAAPTTPAGAT    | 391 |
| Common_marmoset              | LPISSTRAGMVPKVPPTSMVLTGNTASTVPTSRSSRAEETPAAPTTPAGAT    | 390 |
|                              | **:.** . :**.*:**:*** *. *. ** . *** :*..**.*.***:     |     |

|                              |                              |     |
|------------------------------|------------------------------|-----|
| Human                        | -GGSSAWLDSSSENRLGSELSKPGV    | 447 |
| Chimpanzee                   | -GGSSAWLDSSSENRLGSELSKPGV    | 447 |
| Western_lowland_gorilla      | -GGSSAWLDSSSENRLGSELSKPGV    | 447 |
| Bornean_orangutan            | -GGSSAWLDSSSENGLGSELSKPGV    | 447 |
| White-cheeked_gibbon         | -GGSSAWLDSSSENGLGSELSKPGML   | 447 |
| Agile_gibbon                 | -GGSSAWLDSSSENGLGSELSKPGV    | 447 |
| Island_siamang_gibbon        | -GGSSAWLDSSSENGLGSELSKPGV    | 447 |
| Colobus_monkey               | -GGRSAWLDSSSENGSFELELSKPGML  | 442 |
| Francois'_leaf_monkey        | -GGCSAWLDSSSENGSFELELSKPGML  | 446 |
| Olive_baboon                 | -GGRSAWLDSSSENGGFESELSKPGIL  | 448 |
| Rhesus_macaque               | -GGRSAWLDSSSENGGFESELSKPGIL  | 448 |
| Talapoin_monkey              | -GGRSAWLDSSSENGGFESELSKPGML  | 447 |
| African_green_monkey         | -GGRSAWLDSSSENGGFESELSKPGML  | 447 |
| Patas_monkey                 | -GGRSAWLDSSSENGGFESELSKPGML  | 447 |
| Allen's_swamp_monkey         | TGGRSAWLDSSSENGGFESELSKPGML  | 446 |
| Duski_titi_monkey            | -GGSSAWLDKNSSENGGLGSELSKPGIL | 438 |
| Common_woolly_monkey         | -GGSSAWLDNNSSENGGLGSELSKPGML | 440 |
| Black-handed_spider_monkey   | -GGSSAWLDNNSSENGGLGSELSKPGML | 440 |
| Owl_monkey                   | -GGSSAWLDNNSSENGGLGSELSKPGIL | 440 |
| Red-chested_mustached_monkey | -GGSSAWLDNNSSENGGLGSELSKPGML | 440 |
| Common_marmoset              | -GGSSAWLDNNSSENGGLGSELSKPGML | 439 |

\*\* \*\*\*\*\*..\*\*\* .: \*\*\*\*\*:\*. \* \*\* \*\*\*\* \*\*\*\*\*.\*\*

|                              |                                 |     |
|------------------------------|---------------------------------|-----|
| Human                        | GMGPCHGPEENEYKSEGTFGIVHAENPSIQ  | 497 |
| Chimpanzee                   | GMGPCHGPEENEYKSEGTFGIVHAENPSIQ  | 497 |
| Western_lowland_gorilla      | GMGPCHGPEENEYKSEGTFGIVHAENPSIQ  | 497 |
| Bornean_orangutan            | GIGPCHGPEENEYKSEGTFGIVHAENPSIQ  | 497 |
| White-cheeked_gibbon         | GMGPCHGPEENEYKSEGTFGIVHAENPSIQ  | 497 |
| Agile_gibbon                 | GMGPCHGPEENEYKSEGTFGIVHAENPSIQ  | 497 |
| Island_siamang_gibbon        | GMGPCHGPEENEYKSEGTFGIVHAENPSIQ  | 497 |
| Colobus_monkey               | GMGPCHGPEENEYKSEGTFGIVHAENPSIQ  | 492 |
| Francois'_leaf_monkey        | GMGPCHGPEENEYKSEGTFGIVHAENPSIQ  | 495 |
| Olive_baboon                 | GMGPCHGPEENEYKSEGTFGIVHAENPSIQ  | 498 |
| Rhesus_macaque               | GMGPCRGPPEENEYKSEGTFGIVHAENPSIQ | 498 |
| Talapoin_monkey              | GMGPCHGPEENEYKSEGTFGIVHAENPSIQ  | 497 |
| African_green_monkey         | GMGSCHGPEENEYKSEGTFGIVHAENPSIQ  | 497 |
| Patas_monkey                 | GMGPCHGPEENEYKSEGTFGIVHAENPSIQ  | 497 |
| Allen's_swamp_monkey         | GMGPCHGPEENEYKSEGTFGIVHAENPSIQ  | 496 |
| Duski_titi_monkey            | DVGPCHGPEENEYKSEGTFEIVHAENPSIQ  | 488 |
| Common_woolly_monkey         | GVGPCHGPEENEYKSEGTFGIVHAEDPSIQ  | 490 |
| Black-handed_spider_monkey   | GVGPCHGPEENEYKSEGTFGIVHAEDPSIQ  | 490 |
| Owl_monkey                   | GMGPCHGPEENEYKSEGTFGIVHAENPSIQ  | 490 |
| Red-chested_mustached_monkey | GMGPCHGPEENEYKSEGTFGIVHAENPSIQ  | 490 |
| Common_marmoset              | GVGPCHGPEENEYKSEGTFGIVHAENPSIQ  | 489 |

.:\*.\*:\*\*\*\*\* \*\*\*\*\*:\*\*\*\*\* . \*\* \*.. : .\*.\*:

|                              |                                              |     |
|------------------------------|----------------------------------------------|-----|
| Human                        | DRKFQEREVPCHRSPGALWLQVAVTGVLVVTTLLVVLYRRRLH  | 540 |
| Chimpanzee                   | DRKFQEREVPCHRSPGALWLQVAVTGVLVVTTLLVVLYRRRLH  | 540 |
| Western_lowland_gorilla      | DRKFQEREVPCHRPLPGALWLQVAVTGVLVVTTLLVVLYRRRLH | 540 |
| Bornean_orangutan            | NQKFQEGEVPCHRSPGALWLQVAVTGVLVVTTLLVVLYRRRLH  | 540 |
| White-cheeked_gibbon         | GRKFQEGEVPCHRSPGALWLQVAVAGVLAVTTLLVVLYRRRLH  | 540 |
| Agile_gibbon                 | GRKFQEGEVPCHRSPGALWLQVAVAGVLAVTTLLVVLYRRRLH  | 540 |
| Island_siamang_gibbon        | GRKFQEGEVPCHRSPGALWLQVAVAGVLAVTTLLVVLYRRRLH  | 540 |
| Colobus_monkey               | DQKFQEREVPCHRSPGALWLQAAVAGVLVVTTLLVAMYRRRLH  | 535 |
| Francois'_leaf_monkey        | DQKFQEWVVPCHRSPGALWLQAAVAGVLVVTTLLVAMYRRRLH  | 538 |
| Olive_baboon                 | DQKFQEREVPCHRSPGALWLQAAVAGVLVVTTLLVAMYRRRLH  | 541 |
| Rhesus_macaque               | DQKFQEREVPCHRSPGALWLQAAVAGVLVVTTLLVAMYRRRLH  | 541 |
| Talapoin_monkey              | DQKFQEREVPCHRSPGALWLQAAVAGVLVVTTLLVAMYRRRLH  | 540 |
| African_green_monkey         | DQKFQKREVPCHRSPGALWLQAAVAGVLVVTTLLVAMYRRRLH  | 540 |
| Patas_monkey                 | DQKFQKREVPCHRSPGALWLQAAVAGVLVVTTLLVAMYRRRLH  | 540 |
| Allen's_swamp_monkey         | DQKFQEREMPCHRSPGALWLQAAVAGVLVVTTLLVAMYRRRLH  | 539 |
| Duski_titi_monkey            | NQKFQDEEAPCHWSSLGSPWLQAAVAGVLAAILLAVLYQRRQL  | 531 |
| Common_woolly_monkey         | DQKFQDEEVPCHWSSLGSPWLQAAVAGVLAAILLAVLYQRRQL  | 533 |
| Black-handed_spider_monkey   | DQKFQDEEAPCHWSSLGSPWLQAAVAGVLAAILLAVLYQRRQL  | 533 |
| Owl_monkey                   | DQKFQDEEVPCHWSSLGSPWLQAAVAGMLAAAILLAVLYQRRQL | 533 |
| Red-chested_mustached_monkey | DQKFQDEEVPCHWSSLGSPWLQAAVAGVLAAILLAVLYQRRQL  | 533 |
| Common_marmoset              | DQKFQDEEVPCHWSSLGSPWLQAAVAGVLAAILLAVLYQRRQL  | 532 |
|                              | .:***. * * * . .: ***.*::*:*. ** .:***       |     |
